# Supplementary material for: Robust Porous WC‐Based Self‐Supported Ceramic Electrodes for High Current Density Hydrogen Evolution Reaction
Source: PubMed Central journal article supplement (PMC9130889; doi:10.1002/advs.202106029), 2022-03-25
Supplement: ADVS-9-2106029-s001.pdf [file ADVS-9-2106029-s001.pdf]

## Supporting Information

for *Adv. Sci.*, DOI 10.1002/advs.202106029

Robust Porous WC-Based Self-Supported Ceramic Electrodes for High Current Density Hydrogen Evolution Reaction

*Feihong Wang, Yutong Wu, Binbin Dong, Kai Lv, Yangyang Shi, Nianwang Ke, Luyuan Hao, Liangjun Yin, Yu Bai, Xin Xu\*, Yuxi Xian\* and Simeon Agathopoulos*

# Supporting Information

## Robust Porous WC-based Self-Supported Ceramic Electrodes for High Current Density Hydrogen Evolution Reaction

*Feihong Wang<sup>1,+</sup>, Yutong Wu<sup>1,+</sup>, Binbin Dong<sup>2</sup>, Kai Lv<sup>1</sup>, Yangyang Shi<sup>1</sup>, Nianwang Ke<sup>1</sup>, Luyuan Hao<sup>1</sup>, Liangjun Yin<sup>3</sup>, Yu Bai<sup>4</sup>, Xin Xu<sup>1,\*</sup>, Yuxi Xian<sup>5,\*</sup>, and Simeon Agathopoulos<sup>6</sup>*

<sup>1</sup> CAS Key Laboratory of Materials for Energy Conversion, Department of Materials Science and Engineering, University of Science and Technology of China, Hefei, Anhui 230026, PR China.

<sup>2</sup> School of Materials Science and Engineering, Henan Key Laboratory of Special Protective Materials, Luoyang Institute of Science and Technology, Luoyang, Henan 471023, PR China

<sup>3</sup> School of Energy Science and Engineering, University of Electronic Science and Technology of China, 2006 Xiyuan Road, Chengdu, PR China.

<sup>4</sup> School of Engineering Science, University of Science and Technology of China, Hefei, Anhui 230026, PR China.

<sup>5</sup> CAS Key Laboratory of Mechanical Behaviors and Design of Materials, Department of Modern Mechanics, University of Science and Technology of China, Hefei, Anhui 230026, PR China

<sup>6</sup> Department of Materials Science and Engineering, University of Ioannina, GR-451 10 Ioannina, Greece.

\*: Corresponding author: Tel.: +86 551 3600824, Fax: +86 551 3601592

*E-mail address:* xuxin@ustc.edu.cn (Prof. Xin Xu)

[+] These authors contributed equally to this work.

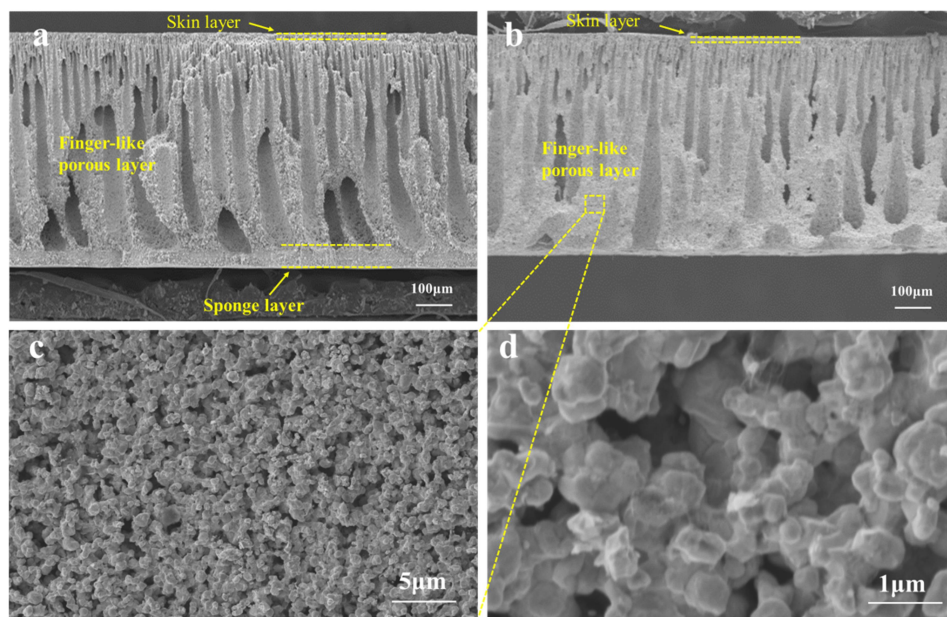

**Figure S1.** Microstructure of the cross-section of ceramic membranes, a) the green sample, and b-d) after heat treatment at 1600 °C in Ar atmosphere at various magnifications.

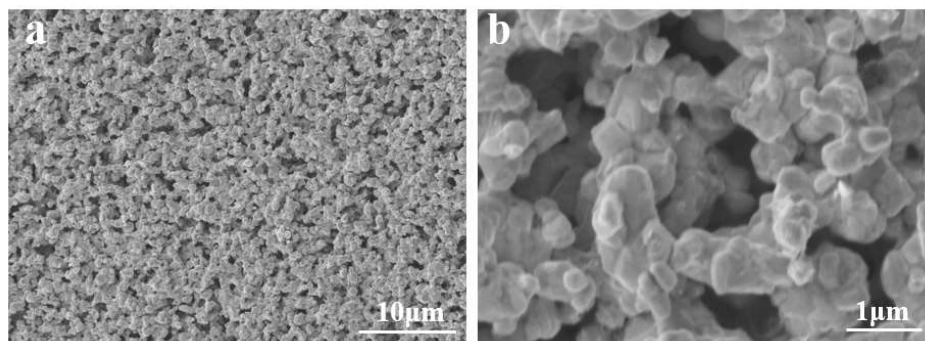

**Figure S2.** Microstructure of the skin layer surface of WC-N/W-1200 electrode at a) low and b) high magnification.

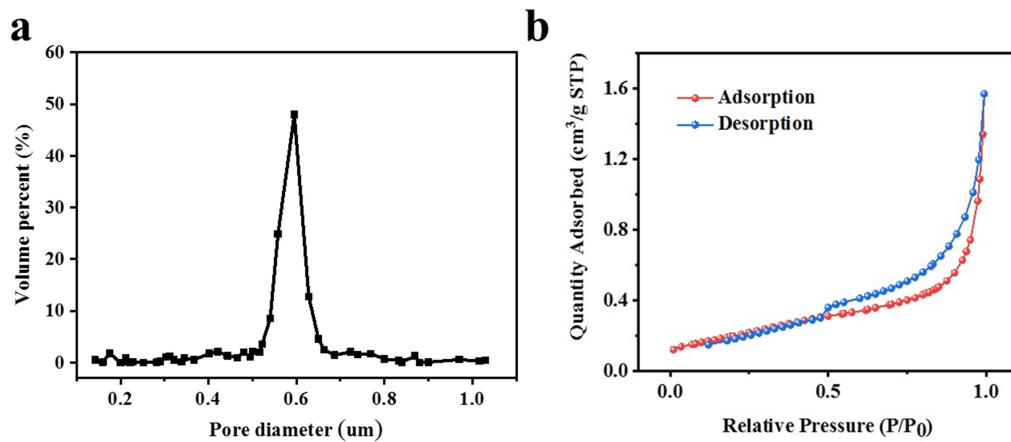

**Figure S3.** a) Pore size distribution and b) BET isotherms of WC-N/W-1200 electrode.

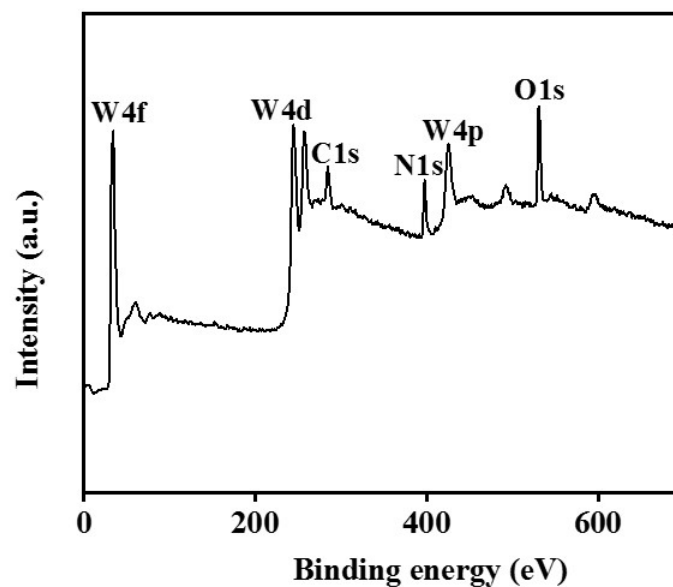

**Figure S4.** XPS full-spectrum of WC-N/W-1200 electrode.

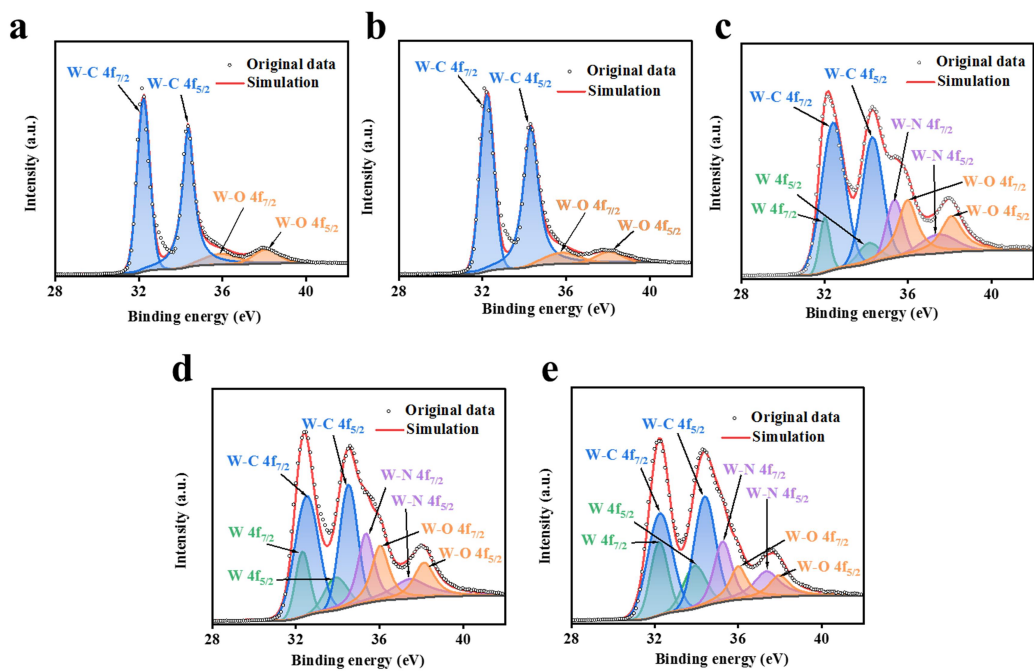

**Figure S5.** High resolution XPS spectra of W 4f of a) WC, b) WC-N/W-1100, c) WC-N/W-1200, d) WC-N/W-1300, and e) WC-N/W-1400.

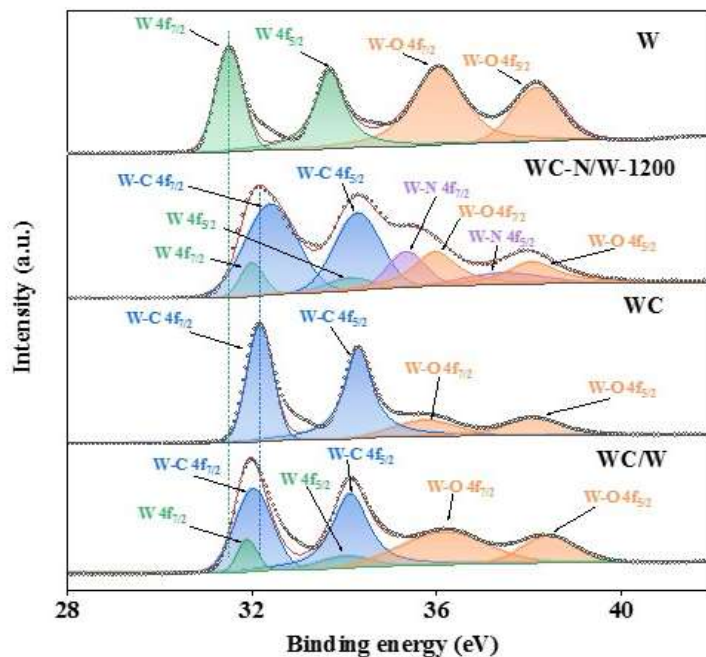

**Figure S6.** High resolution XPS spectra of W 4f in W, WC, WC-N/W-1200 and WC/W.

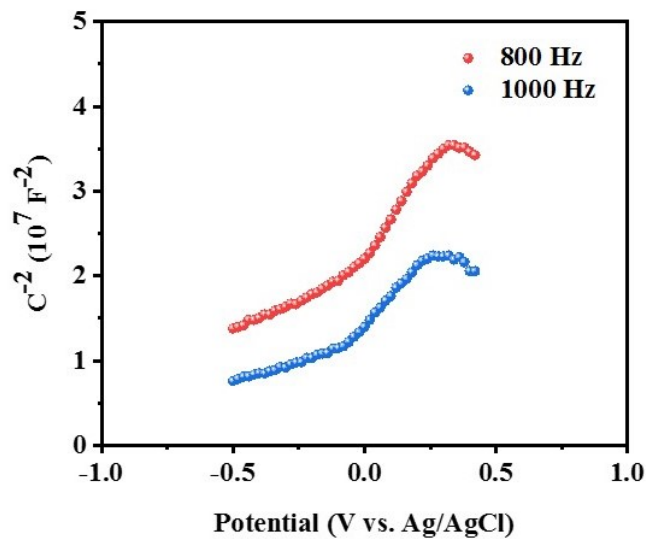

**Figure S7.** Mott-Schottky plots of WC-N/W-1200 electrode.

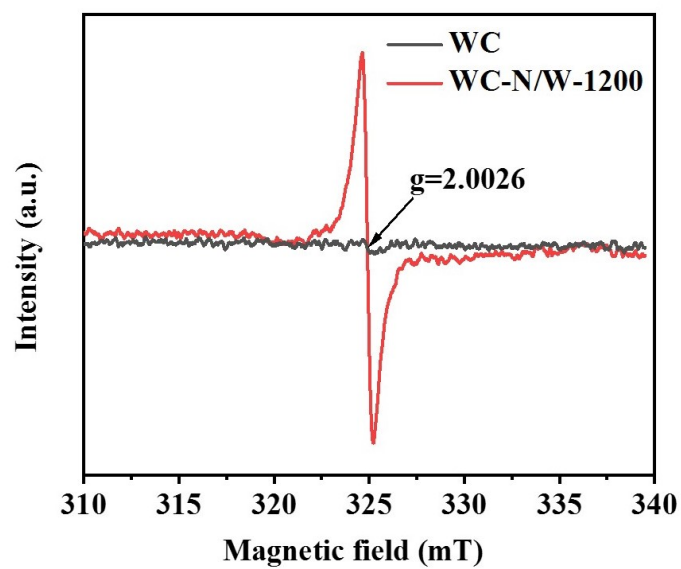

**Figure S8.** Electron paramagnetic resonance (EPR) spectra of WC and WC-N/W-1200 electrodes.

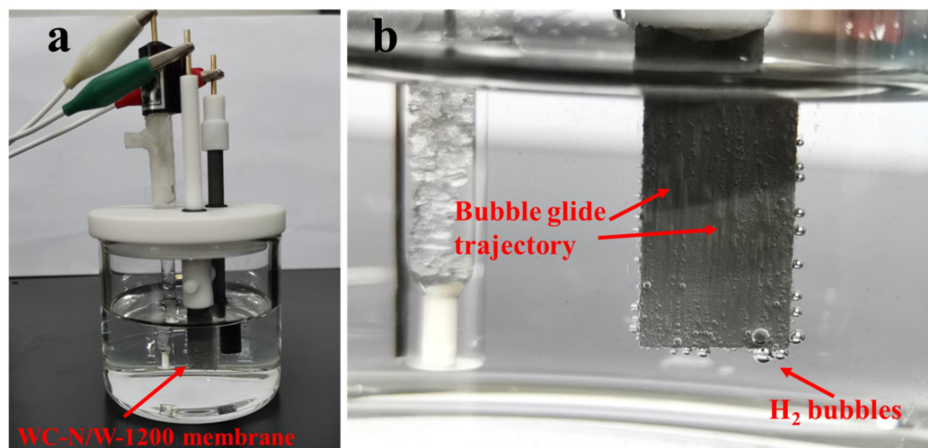

**Figure S9.** (a) Electrochemical test device and (b) H<sub>2</sub> evolved from the electrode in acidic media.

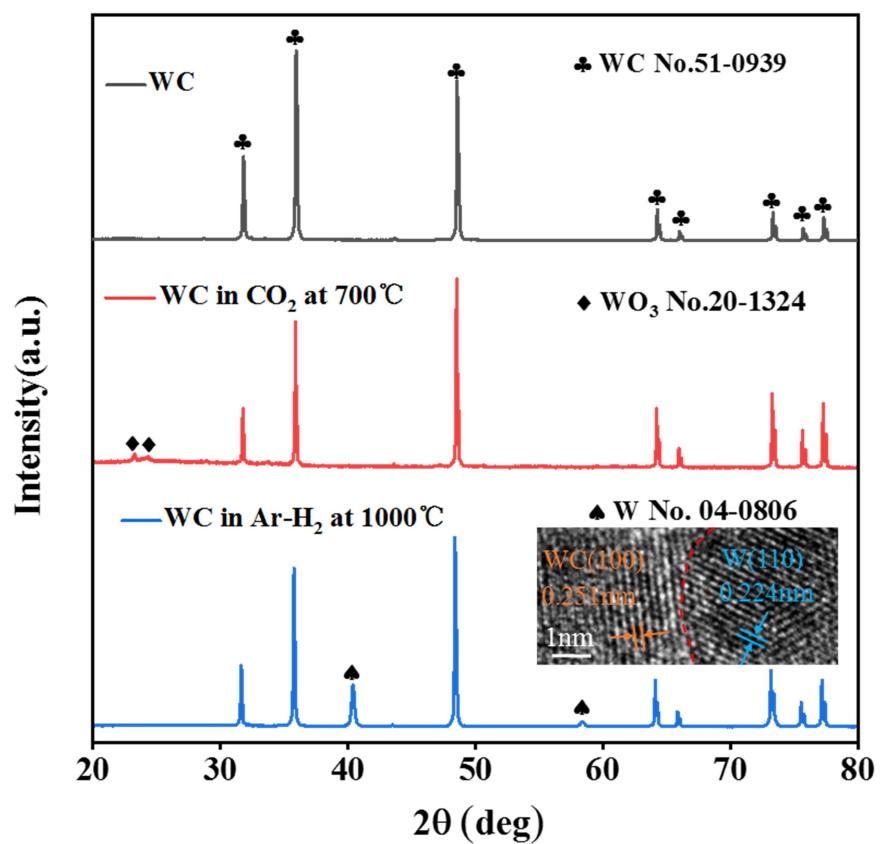

**Figure S10.** X-ray diffractograms of WC and WC electrodes after heat treatment in CO<sub>2</sub> and Ar-H<sub>2</sub> atmosphere (the inset illustrates the HRTEM image).

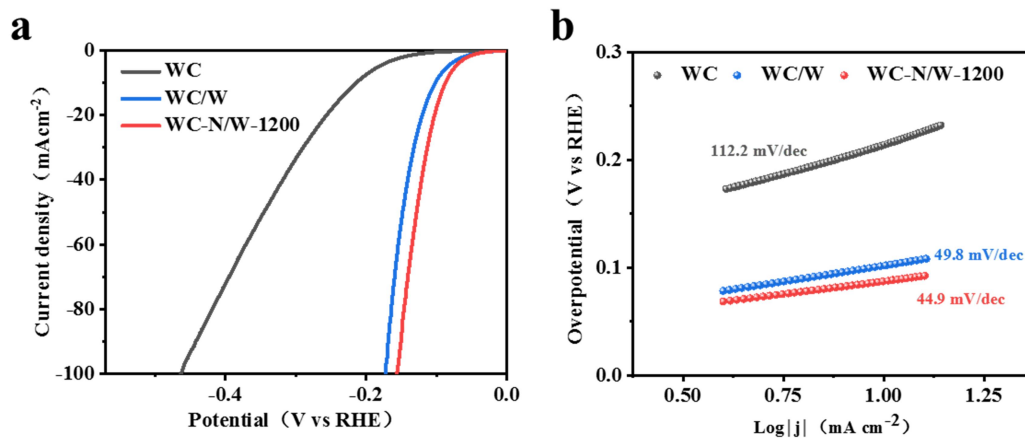

**Figure S11.** Comparison of a) LSV and b) Tafel curves of WC, WC/W and WC-N/W-1200 electrodes in 0.5 M H<sub>2</sub>SO<sub>4</sub>.

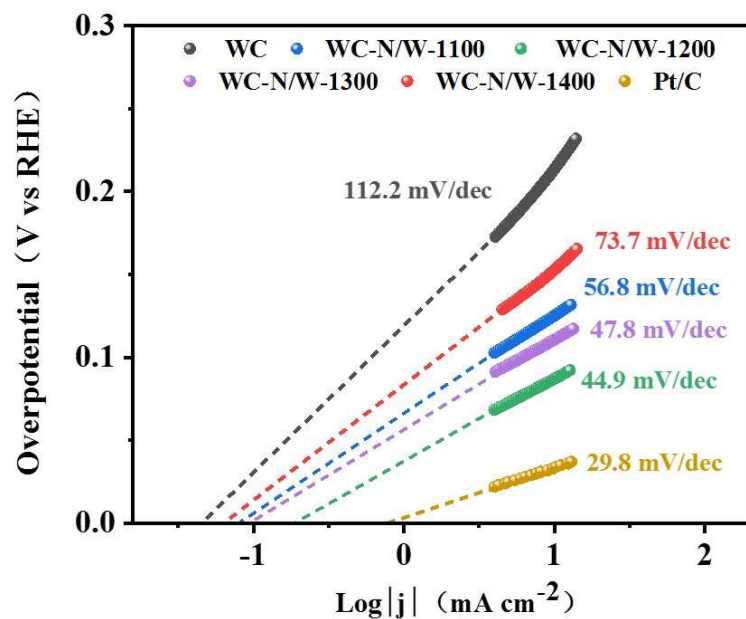

**Figure S12.** Exchange current density ( $j_0$ ) of the WC and the WC-N/W-*T* electrodes calculated by applying extrapolation method for HER in 0.5 M H<sub>2</sub>SO<sub>4</sub>.



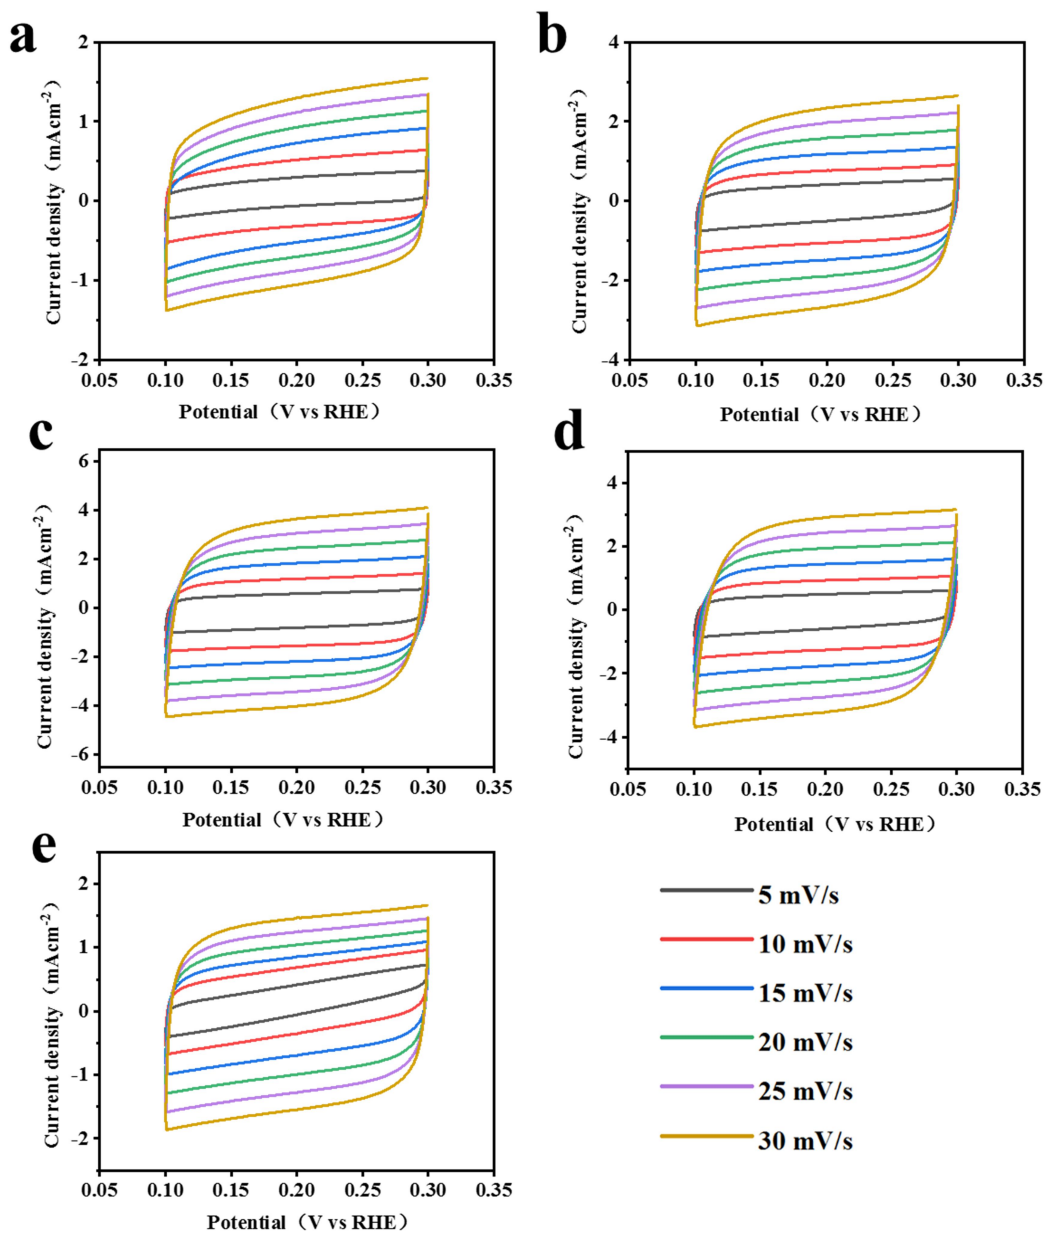

**Figure S13.** The CV curves of a) WC, b) WC-N/W-1100, c) WC-N/W-1200, d) WC-N/W-1300, and e) WC-N/W-1400 electrodes in 0.5 M  $\text{H}_2\text{SO}_4$  for evaluating the  $C_{dl}$ .

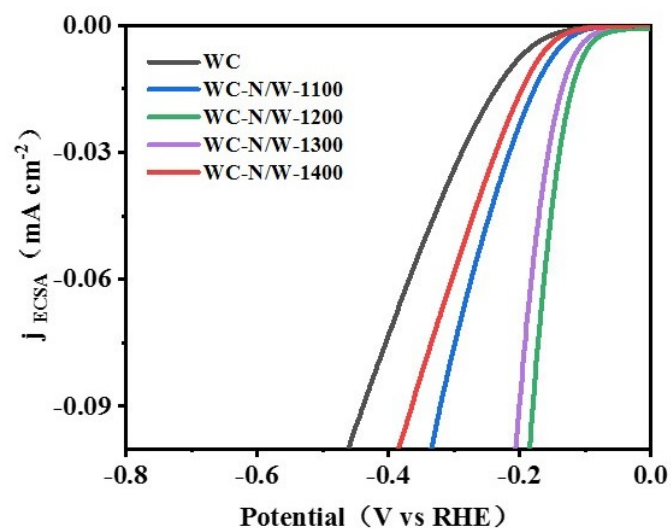

**Figure S14.** ECSA normalized LSV curves of the prepared electrodes in 0.5 M H<sub>2</sub>SO<sub>4</sub>.

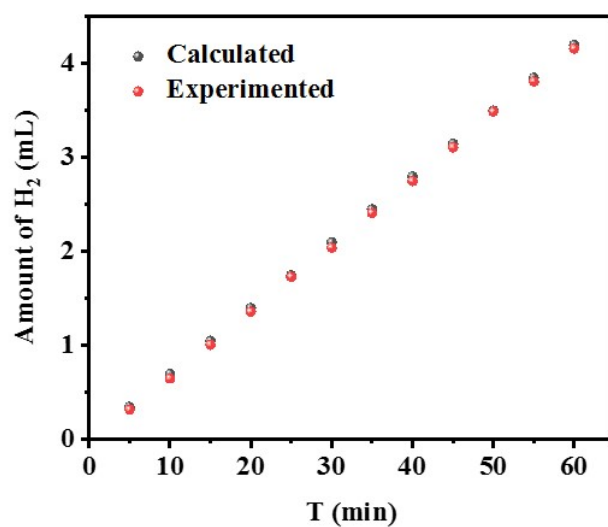

**Figure S15.** Faraday efficiency of WC-N/W-1200 in 0.5 M H<sub>2</sub>SO<sub>4</sub>.

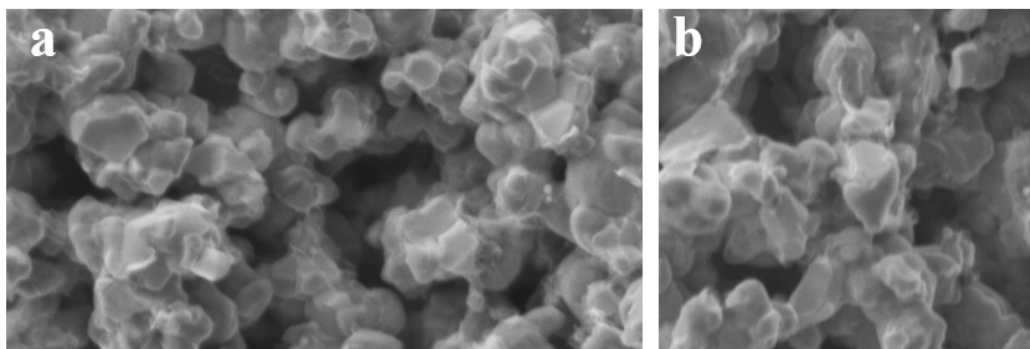

**Figure S16.** Microstructure of the WC-N/W-1200 electrode after cycling in a) 0.5 M H<sub>2</sub>SO<sub>4</sub>

and b) 1 M KOH.

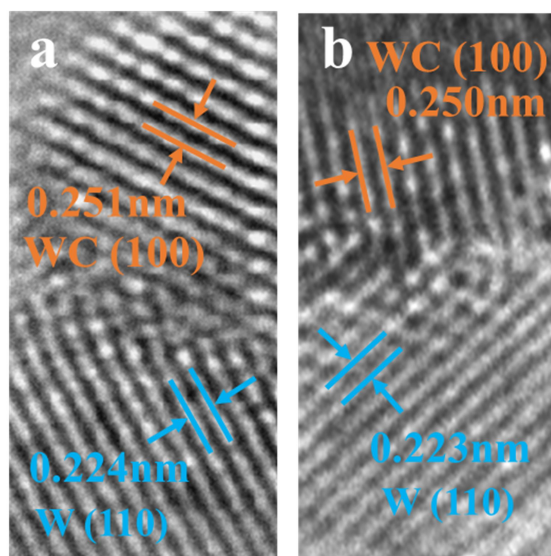

**Figure S17.** HRTEM images of the WC-N/W-1200 electrode after cycling in a) 0.5 M H<sub>2</sub>SO<sub>4</sub> and b) 1 M KOH.

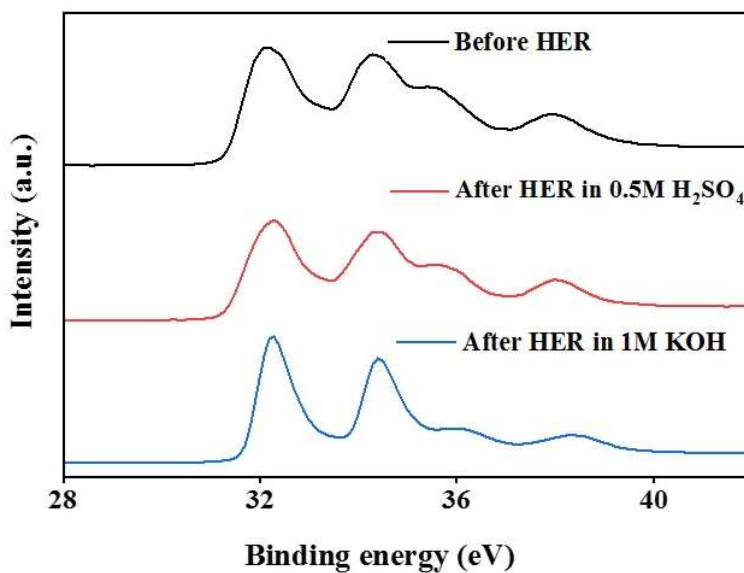

**Figure S18.** XPS spectra of the WC-N/W-1200 membrane after cycling in 0.5 M H<sub>2</sub>SO<sub>4</sub> and 1 M KOH.

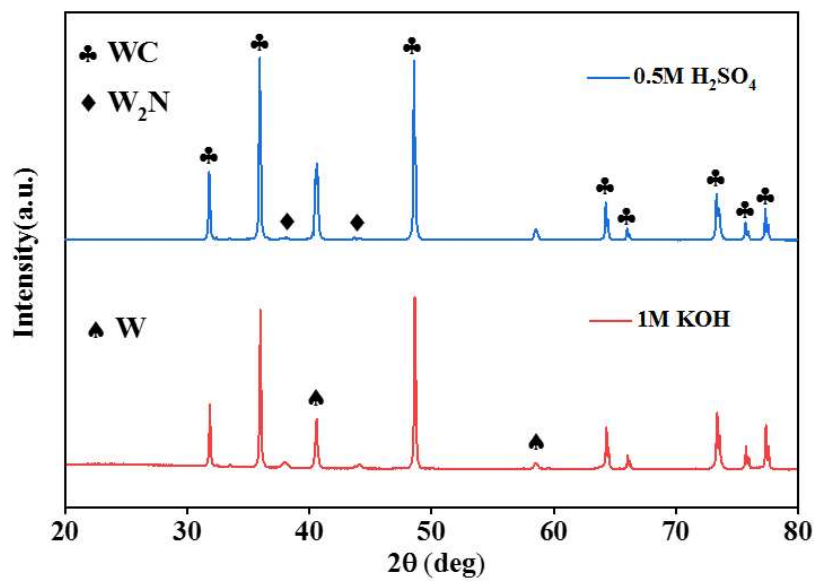

**Figure S19.** X-ray diffractograms of the WC-N/W-1200 membrane after cycling in 0.5 M  $\text{H}_2\text{SO}_4$  and 1 M KOH.

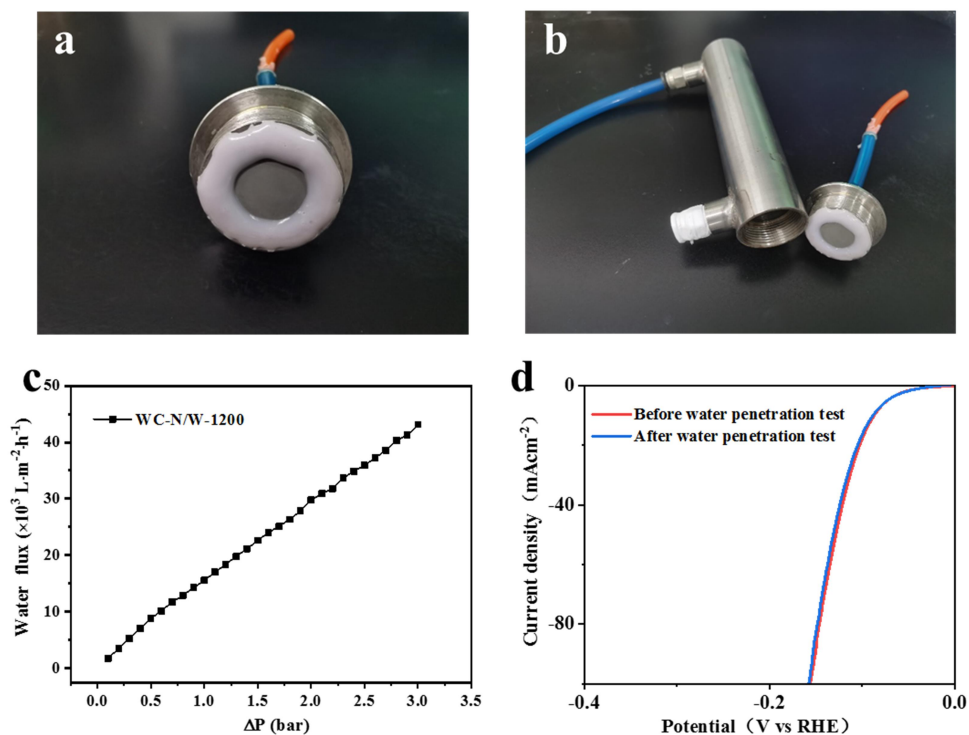

**Figure S20.** Water permeability of a) the encapsulation membrane, b) the test device, c) water permeability curve, and d) LSV curves of the WC-N/W-1200 electrode before and after 4 h penetration test in 0.5 M  $\text{H}_2\text{SO}_4$ .

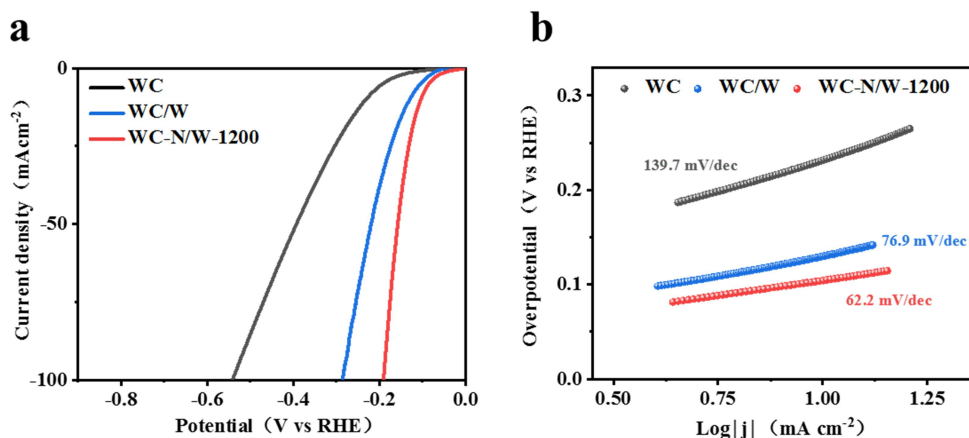

**Figure S21.** Comparison of a) LSV and b) Tafel curves of WC, WC/W, and WC-N/W-1200 electrodes in 1 M KOH.

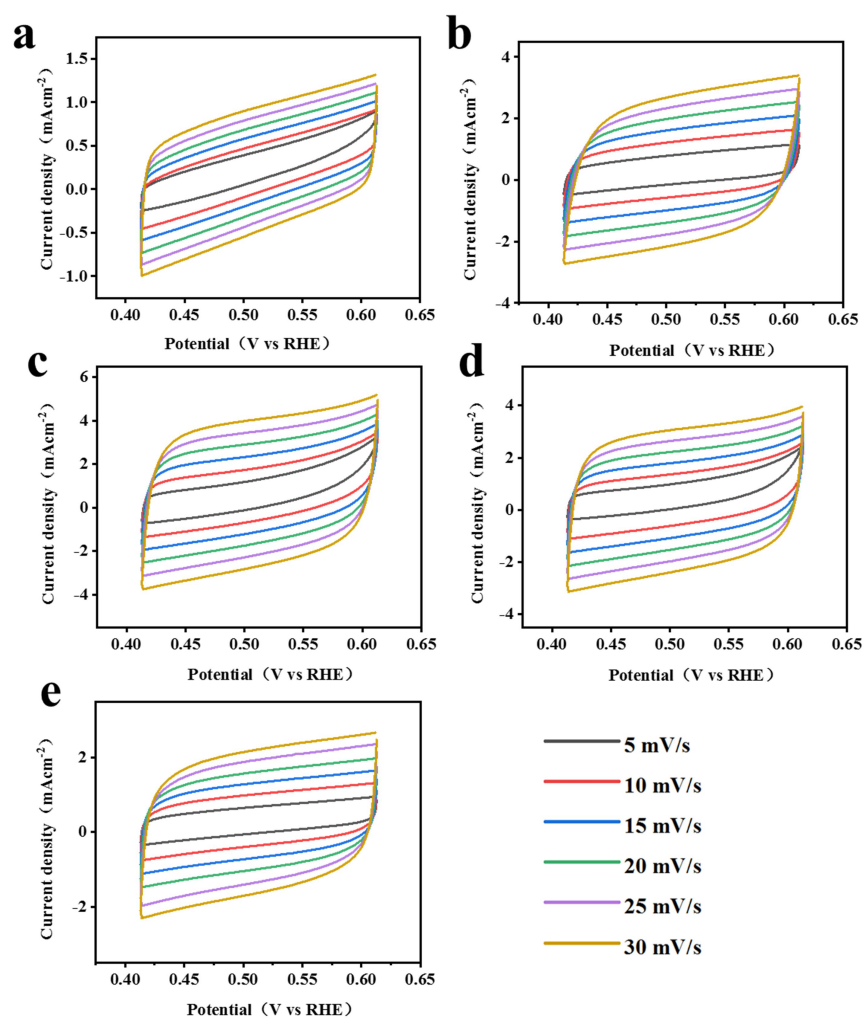

**Figure S22.** The CV curves of a) WC, b) WC-N/W-1100, c) WC-N/W-1200, d) WC-N/W-1300, and e) WC-N/W-1400 electrodes in 1 M KOH for evaluating the  $C_{dl}$ .

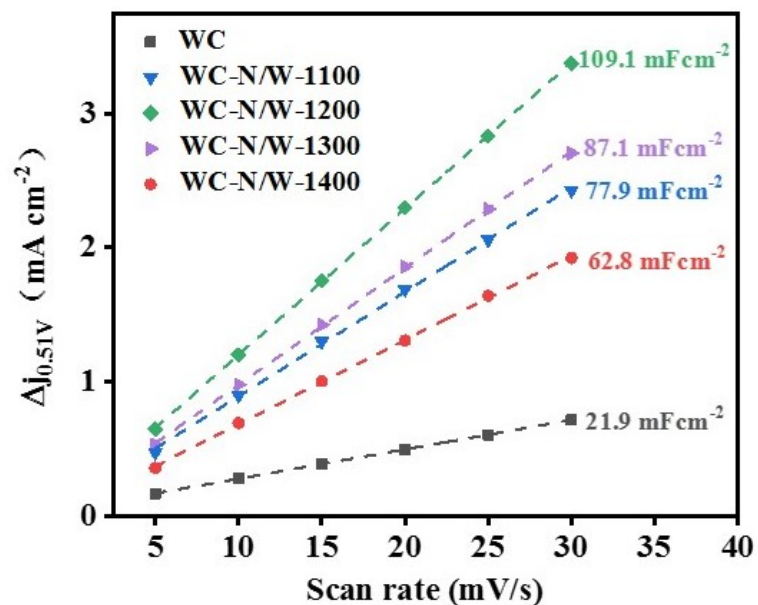

**Figure S23.**  $C_{dl}$  values at the potential of 0.51 V (vs. RHE) of WC and WC-N/W-T membrane electrodes in 1 M KOH.

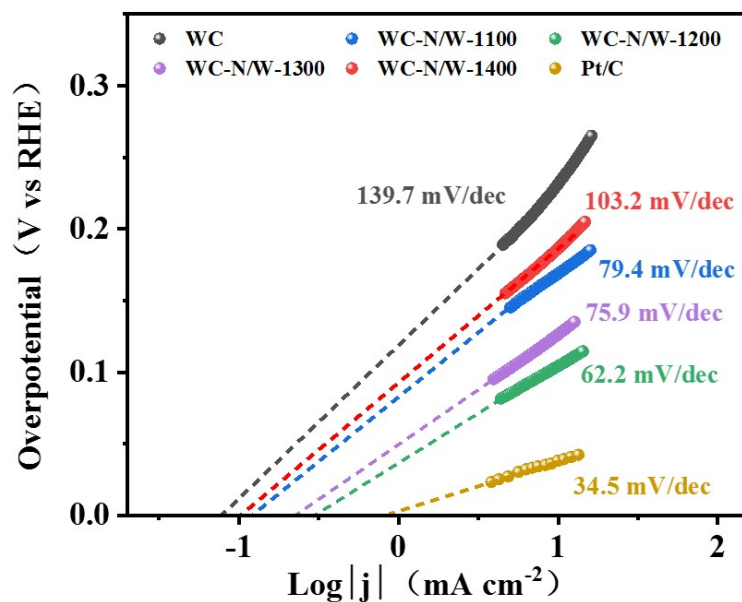

**Figure S24.** Exchange current density ( $j_0$ ) of WC and WC-N/W electrodes calculated by applying extrapolation method for HER in 1 M KOH.

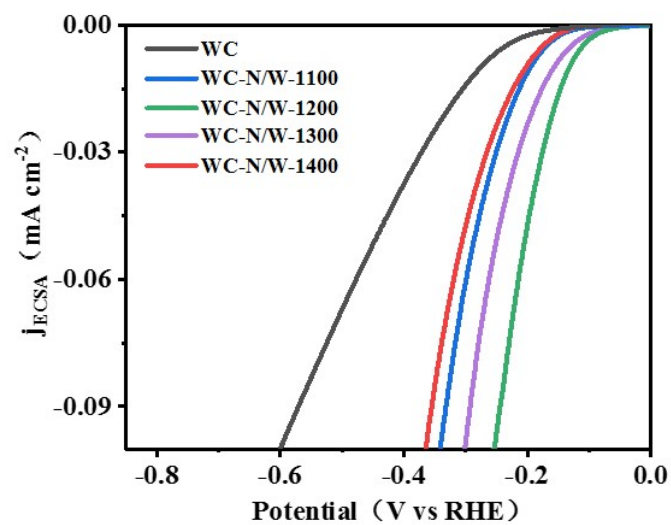

Figure S25. ECSA normalized LSV curves of prepared electrodes in 1 M KOH.

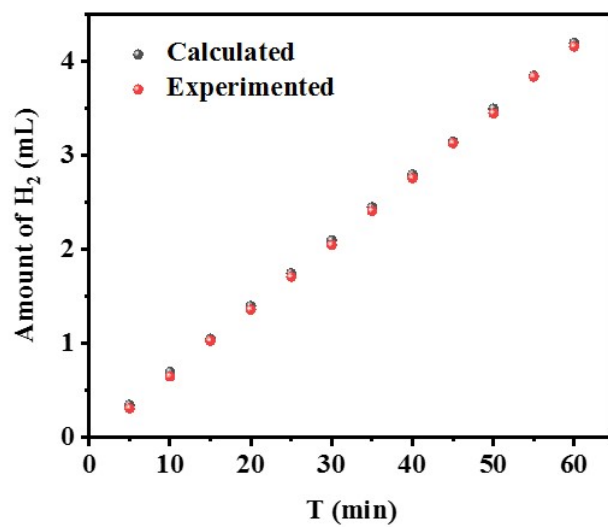

Figure S26. Faraday efficiency of WC-N/W-1200 in 1 M KOH.

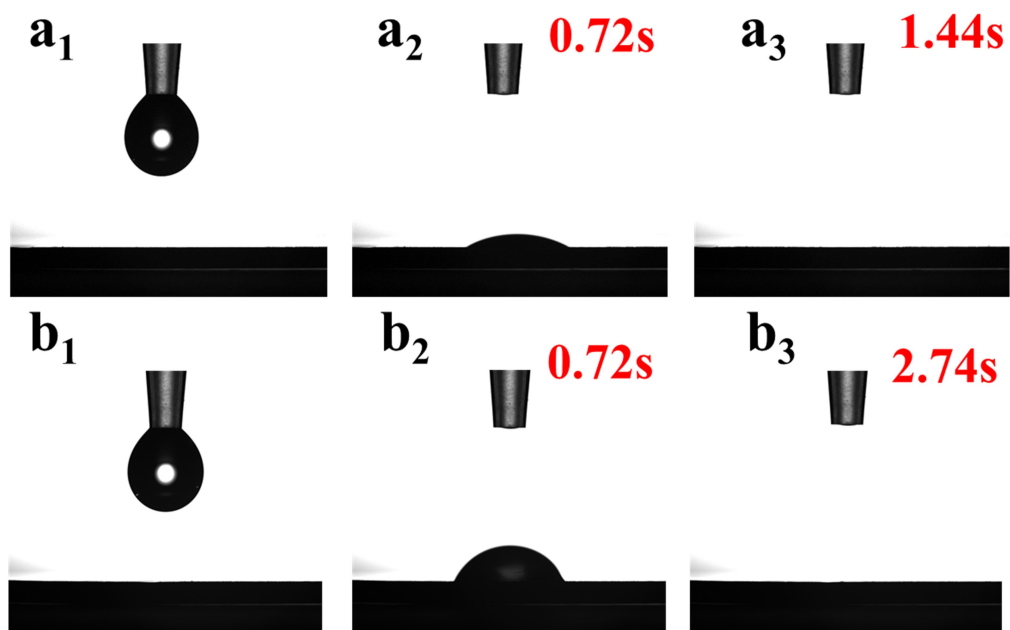

**Figure S27.** Water contact angle evolution over time for the WC-N/W-1200 membrane in a)  $\text{H}_2\text{SO}_4$  and b) KOH.

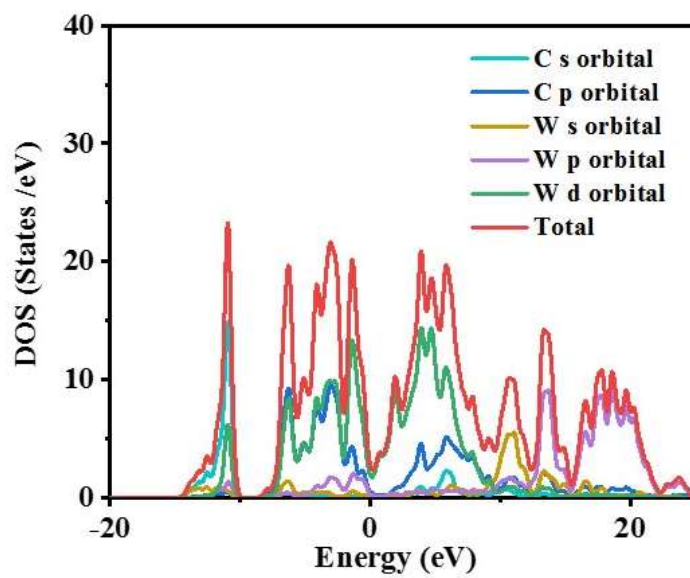

**Figure S28.** The density of states (DOS) for W and C atoms in WC (100).



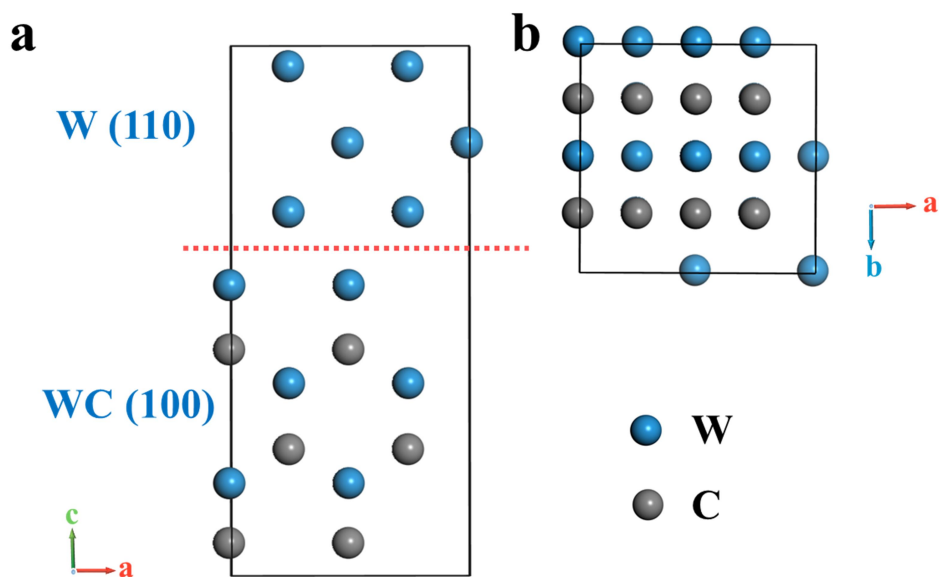

**Figure S29.** a) Side and b) bottom view of the WC (100) /W (110) heterostructure model.

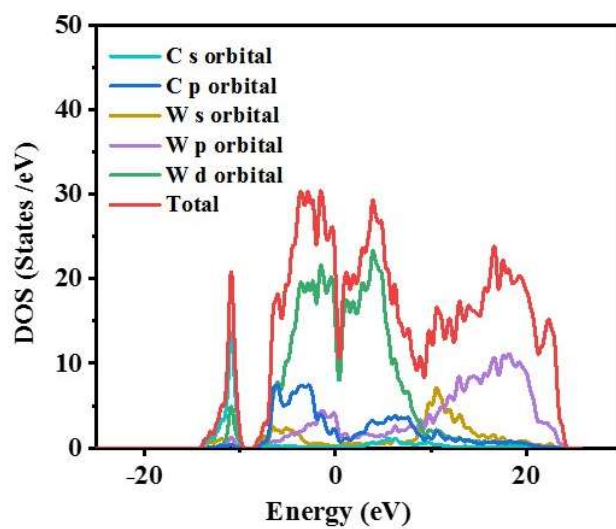

**Figure S30.** The density of states (DOS) for W and C atoms in WC (100) /W (110) heterostructure.

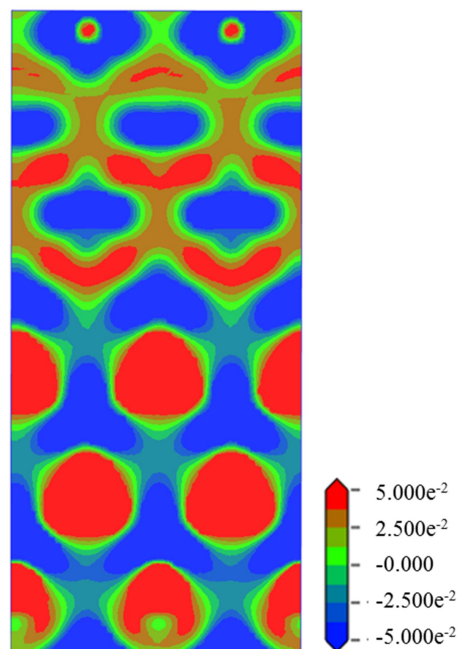

**Figure S31.** Slice of charge density difference at the W/WC interface in WC (100)/W(110) heterostructure.

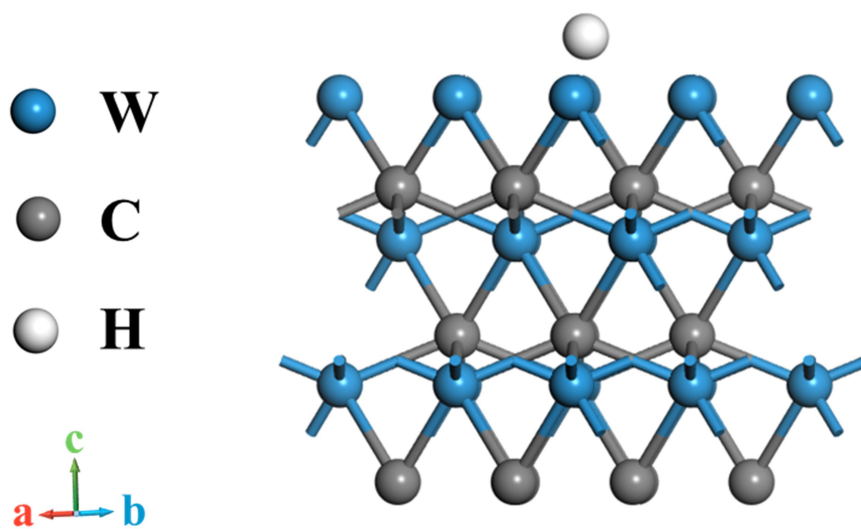

**Figure S32.** Optimized structure of adsorbed H on the WC (100) model surface.

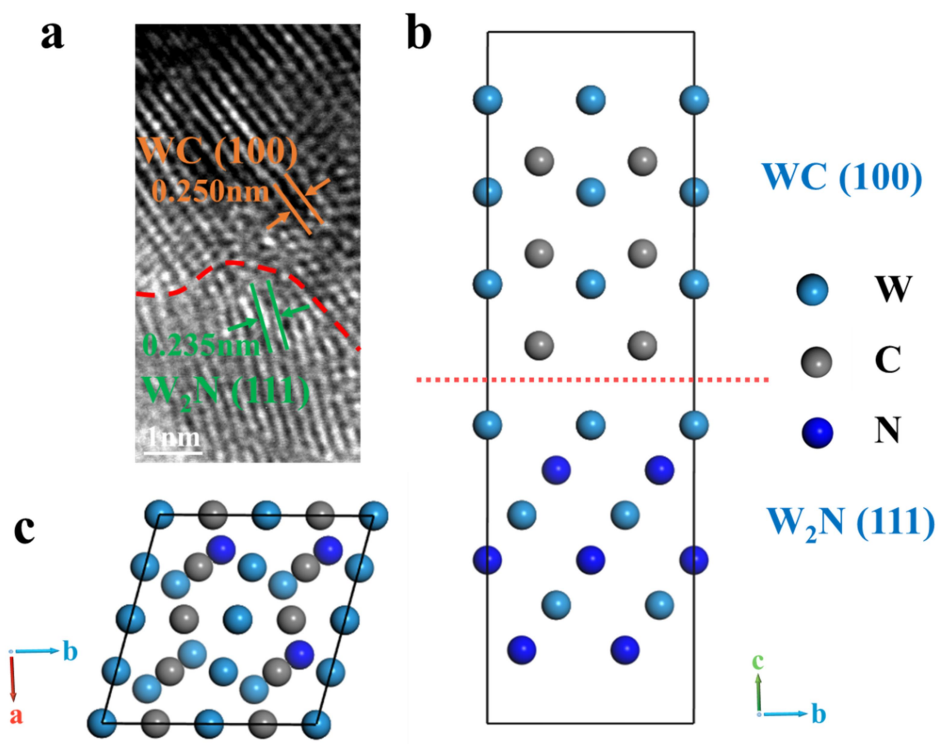

**Figure S33.** a) HRTEM image of WC (100) /W<sub>2</sub>N (111) heterostructure, and b) side and c) bottom view of the WC (100) /W<sub>2</sub>N (111) heterostructure model.

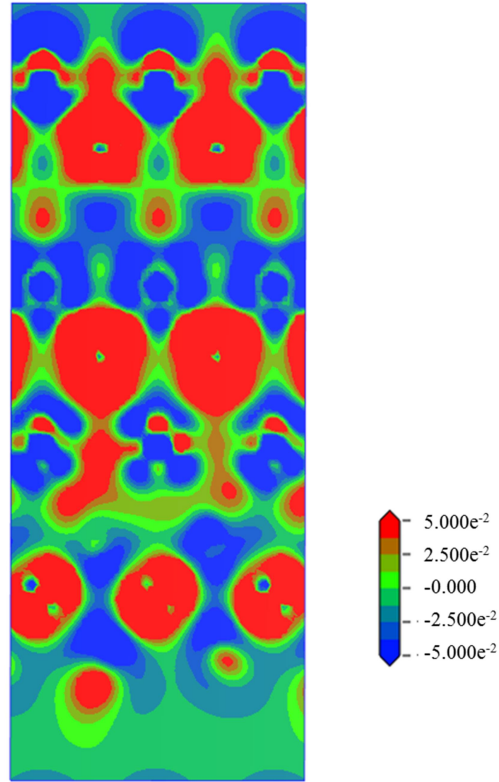

**Figure S34.** Slice of charge density difference at the  $W_2N/WC$  interface in  $WC (100) /W_2N (111)$  heterostructure.

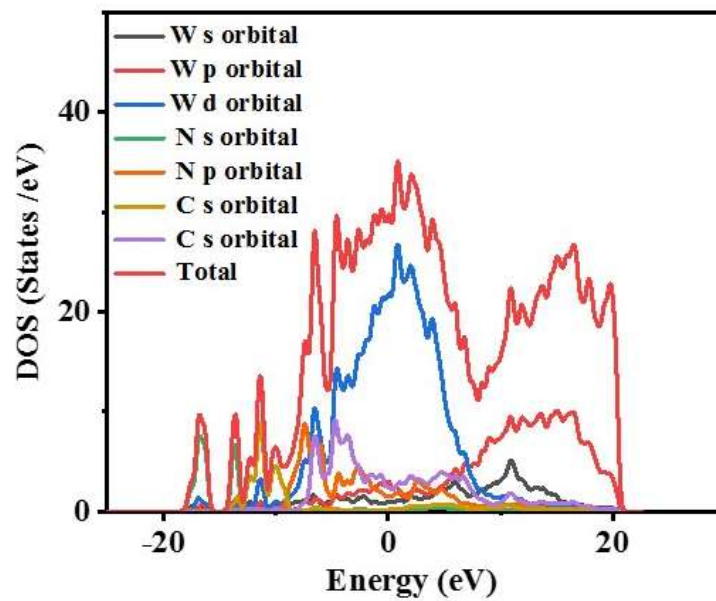

**Figure S35.** The density of states (DOS) for W, N, and C atoms in  $WC (100) /W_2N (111)$  heterostructure.

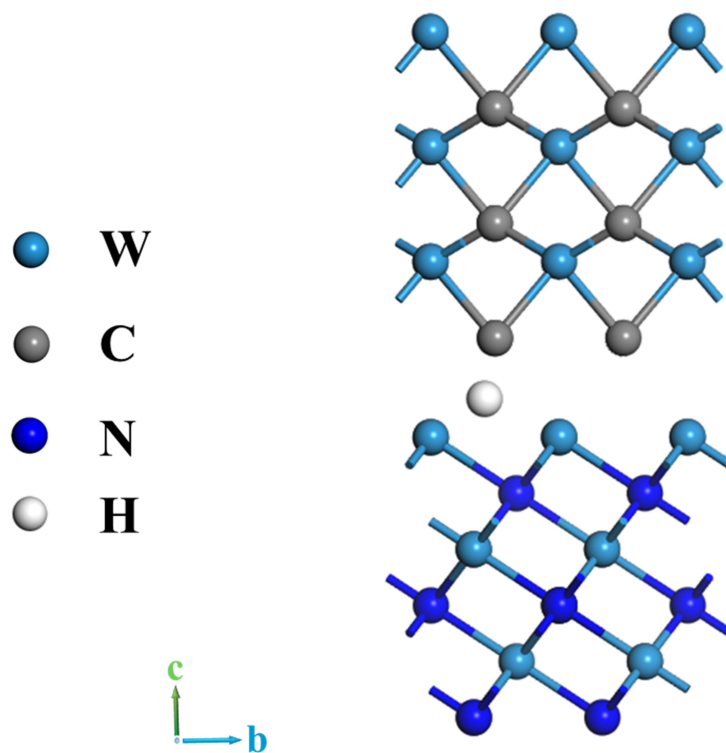

**Figure S36.** Optimized structure of adsorbed H on the WC (100) /W<sub>2</sub>N (111) heterostructure model.

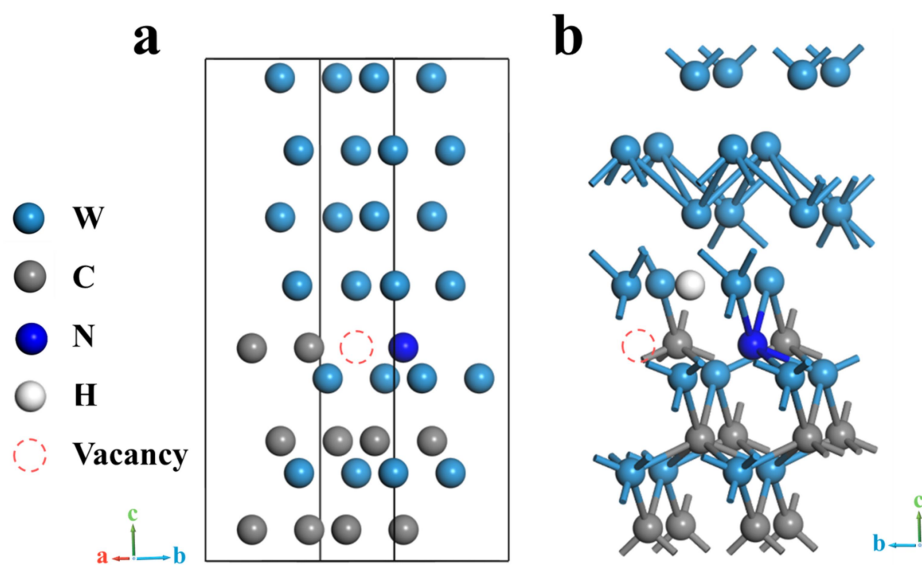

**Figure S37.** a) Schematic representation of the model of WC-N (100) /W (110) (N replaced 1/12 C) heterostructure with vacancy, and b) optimized structure of adsorbed H on the heterostructure models.

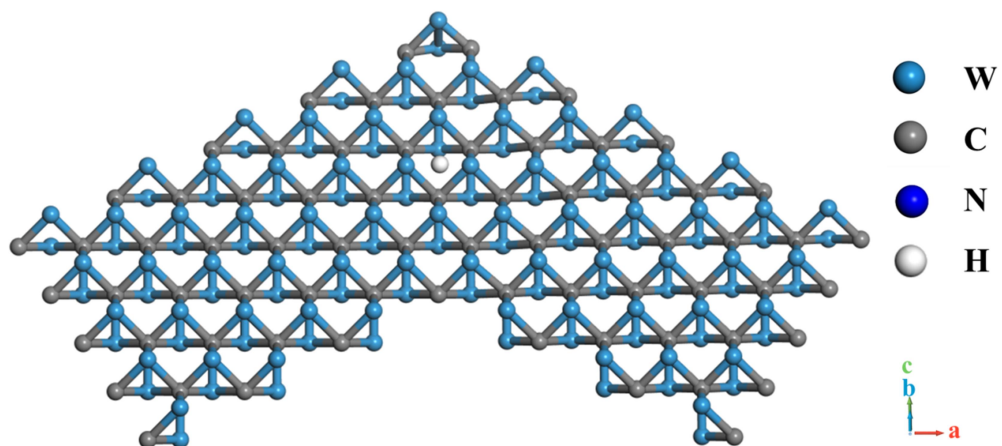

**Figure S38.** Structure of WC(100) twin adsorption of H.

**Table S1.** Composition of WC and graphite slurries (in wt.%).

| Composition                  | WC Slurry | Graphite Slurry |
|------------------------------|-----------|-----------------|
| N-methyl-2-pyrrolidone (NMP) | 16.8      | 55.0            |
| Polyethersulfone (PESf)      | 4.9       | 11.0            |
| Polyvinylpyrrolidone (PVP)   | 1.0       | 1.7             |
| WC powder                    | 73.6      | None            |
| WO <sub>3</sub> powder       | 3.7       | None            |
| Graphite powder              | None      | 32.3            |

**Table S2.** HER performance of the prepared WC and WC-N/W-T membrane electrodes in 0.5 M H<sub>2</sub>SO<sub>4</sub> media.

| Samples     | Overpotential (mV) | Tafel slope (mV/dec) | Cdl (mF cm <sup>-2</sup> ) | j <sub>0</sub> (mA cm <sup>-2</sup> ) | R <sub>ct</sub> (Ω) |
|-------------|--------------------|----------------------|----------------------------|---------------------------------------|---------------------|
| WC          | 213                | 112.2                | 39.4                       | 0.046                                 | 4.618               |
| WC-N/W-1100 | 126                | 56.8                 | 81.7                       | 0.083                                 | 0.817               |
| WC-N/W-1200 | 87                 | 44.9                 | 125.3                      | 0.192                                 | 0.557               |
| WC-N/W-1300 | 111                | 47.8                 | 100.3                      | 0.096                                 | 0.586               |
| WC-N/W-1400 | 152                | 73.7                 | 49.7                       | 0.066                                 | 2.330               |

**Table S3.** ECSA of the prepared WC and WC-N/W-T membrane electrodes in 0.5 M H<sub>2</sub>SO<sub>4</sub> and 1 M KOH.

| Samples     | A <sub>ECSA</sub> (cm <sup>2</sup> )<br>0.5 M H <sub>2</sub> SO <sub>4</sub> | A <sub>ECSA</sub> (cm <sup>2</sup> )<br>1 M KOH |
|-------------|------------------------------------------------------------------------------|-------------------------------------------------|
| WC          | 985.0                                                                        | 547.5                                           |
| WC-N/W-1100 | 2042.5                                                                       | 1947.5                                          |
| WC-N/W-1200 | 3132.5                                                                       | 2727.5                                          |
| WC-N/W-1300 | 2507.5                                                                       | 2177.5                                          |
| WC-N/W-1400 | 1242.2                                                                       | 1570.0                                          |

**Table S4.** HER performance of the prepared WC and WC-N/W-T membrane electrodes in 1 M KOH media.

| <b>Samples</b>     | <b>Over potential (mV)</b> | <b>Tafel slope (mV/dec)</b> | <b>C<sub>dl</sub> (mF cm<sup>-2</sup>)</b> | <b>j<sub>0</sub> (mA cm<sup>-2</sup>)</b> | <b>R<sub>ct</sub> (Ω)</b> |
|--------------------|----------------------------|-----------------------------|--------------------------------------------|-------------------------------------------|---------------------------|
| <b>WC</b>          | 232                        | 139.7                       | 21.9                                       | 0.080                                     | 6.923                     |
| <b>WC-N/W-1100</b> | 168                        | 79.4                        | 77.9                                       | 0.122                                     | 1.123                     |
| <b>WC-N/W-1200</b> | 104                        | 62.2                        | 109.1                                      | 0.311                                     | 0.514                     |
| <b>WC-N/W-1300</b> | 126                        | 75.9                        | 87.1                                       | 0.229                                     | 0.861                     |
| <b>WC-N/W-1400</b> | 186                        | 103.2                       | 62.8                                       | 0.103                                     | 2.361                     |

**Table S5.** Comparison of the HER performance of the electrodes prepared in the present study with previously reported values for various tungsten carbide-based catalysts in 0.5 M H<sub>2</sub>SO<sub>4</sub>.

| <b>Materials</b>            | <b>Electrolyte</b>                   | <b>Overpotential (mV)</b> | <b>Tafel slope (mV dec<sup>-1</sup>)</b> | <b>Ref.</b> |
|-----------------------------|--------------------------------------|---------------------------|------------------------------------------|-------------|
| <b>WC-CNTs</b>              | 0.5 M H <sub>2</sub> SO <sub>4</sub> | 145                       | 72                                       | [1]         |
| <b>2D WC</b>                | 0.5 M H <sub>2</sub> SO <sub>4</sub> | 120                       | 38                                       | [2]         |
| <b>N-doped WC</b>           | 0.5 M H <sub>2</sub> SO <sub>4</sub> | 113                       | 75                                       | [3]         |
| <b>ES-WC/W<sub>2</sub>C</b> | 0.5 M H <sub>2</sub> SO <sub>4</sub> | 159                       | 45                                       | [4]         |
| <b>WC/W<sub>2</sub>C</b>    | 0.5 M H <sub>2</sub> SO <sub>4</sub> | 69                        | 52                                       | [5]         |
| <b>Cu@WC</b>                | 0.5 M H <sub>2</sub> SO <sub>4</sub> | 92                        | 50.5                                     | [6]         |
| <b>P-W<sub>2</sub>C@NC</b>  | 0.5 M H <sub>2</sub> SO <sub>4</sub> | 89                        | 53                                       | [7]         |
| <b>W<sub>2</sub>C/MWNT</b>  | 0.5 M H <sub>2</sub> SO <sub>4</sub> | 123                       | 45                                       | [8]         |
| <b>WCN</b>                  | 0.5 M H <sub>2</sub> SO <sub>4</sub> | 128                       | 65                                       | [9]         |
| <b>WC-N/W-1200</b>          | 0.5 M H <sub>2</sub> SO <sub>4</sub> | 87                        | 44.9                                     | This work   |



**Table S6.** Comparison of the HER performance of the electrodes prepared in the present study with previously reported values for various tungsten carbide-based catalysts in 1 M KOH.

| <b>Materials</b>                                                    | <b>Electrolyte</b> | <b>Overpotential (mV)</b> | <b>Tafel slope (mV dec<sup>-1</sup>)</b> | <b>Ref.</b> |
|---------------------------------------------------------------------|--------------------|---------------------------|------------------------------------------|-------------|
| <b>WC-CNTs</b>                                                      | 1 M KOH            | 137                       | 106                                      | [1]         |
| <b>Cu@WC</b>                                                        | 1 M KOH            | 119                       | 88.7                                     | [6]         |
| <b>Co<sub>2</sub>P/WC@NC</b>                                        | 1 M KOH            | 180                       | 90                                       | [10]        |
| <b>W<sub>2</sub>N/WC</b>                                            | 1 M KOH            | 148.5                     | 47.4                                     | [11]        |
| <b>p-WC<sub>x</sub> NWs</b>                                         | 1 M KOH            | 122                       | 56                                       | [12]        |
| <b>(Mo<sub>2</sub>C)<sub>0.34</sub>-<br/>(WC)<sub>0.32</sub>/NG</b> | 1 M KOH            | 93                        | 54                                       | [13]        |
| <b>W-W<sub>2</sub>C</b>                                             | 1 M KOH            | 147                       | 51                                       | [14]        |
| <b>C-CWC</b>                                                        | 1 M KOH            | 73                        | 25                                       | [15]        |
| <b>Mo<sub>2</sub>C/W<sub>2</sub>C</b>                               | 1 M KOH            | 132                       | 76                                       | [16]        |
| <b>WC-N/W-1200</b>                                                  | 1 M KOH            | 104                       | 62.2                                     | This work   |

**Table S7.** Comparison of the HER performance of the electrodes prepared in the present study with previously reported values for metal carbide catalysts in 0.5 M H<sub>2</sub>SO<sub>4</sub>.

| <b>Materials</b>                                | <b>Electrolyte</b>                      | <b>Overpotential (mV)</b> | <b>Tafel slope (mV dec<sup>-1</sup>)</b> | <b>Synthesis</b>                     | <b>electrode type</b> | <b>Ref.</b> |
|-------------------------------------------------|-----------------------------------------|---------------------------|------------------------------------------|--------------------------------------|-----------------------|-------------|
| <b>MoC-<br/>Mo<sub>2</sub>C-790</b>             | 0.5 M<br>H <sub>2</sub> SO <sub>4</sub> | 114                       | 62                                       | Electrolytic deposition<br>(in situ) | Self-<br>supported    | [17]        |
| <b>Mo<sub>2</sub>N-<br/>Mo<sub>2</sub>C/HGr</b> | 0.5 M<br>H <sub>2</sub> SO <sub>4</sub> | 157                       | 55                                       | Catalytic etching<br>(ex-situ)       | Powder                | [18]        |
| <b>Mo<sub>x</sub>C-0.4</b>                      | 0.5 M<br>H <sub>2</sub> SO <sub>4</sub> | 155                       | 48                                       | Template method<br>(ex-situ)         | Powder                | [19]        |
| <b>W-SiC</b>                                    | 0.5 M                                   | 286                       | /                                        | PDC                                  | Self-                 | [20]        |

|                                     |                                         |     |      |                                              |                |           |
|-------------------------------------|-----------------------------------------|-----|------|----------------------------------------------|----------------|-----------|
|                                     | H <sub>2</sub> SO <sub>4</sub>          |     |      | (in situ)                                    | supported      |           |
| <b>SiMoCP</b>                       | 0.5 M<br>H <sub>2</sub> SO <sub>4</sub> | 88  | 37   | Hydrothermal,<br>annealing<br>(ex-situ)      | Powder         | [21]      |
| <b>Ti<sub>2</sub>CT<sub>x</sub></b> | 0.5 M<br>H <sub>2</sub> SO <sub>4</sub> | 170 | 100  | Liquid etching<br>(ex-situ)                  | Powder         | [22]      |
| <b>Ti<sub>3</sub>C<sub>2</sub></b>  | 0.5 M<br>H <sub>2</sub> SO <sub>4</sub> | 169 | 97   | Liquid etching<br>(ex-situ)                  | Powder         | [23]      |
| <b>MoCN-3D</b>                      | 0.5 M<br>H <sub>2</sub> SO <sub>4</sub> | 87  | 51.4 | Hydrothermal<br>annealing<br>(ex-situ)       | Powder         | [24]      |
| <b>Mo<sub>10</sub>/Ti</b>           | 0.5 M<br>H <sub>2</sub> SO <sub>4</sub> | 180 | 91   | Liquid etching,<br>Hydrothermal<br>(ex-situ) | Powder         | [25]      |
| <b>WC-N/W-1200</b>                  | 0.5 M<br>H <sub>2</sub> SO <sub>4</sub> | 87  | 44.9 | Atmosphere sintering<br>(in-situ)            | Self-supported | This work |

**Table S8.** Comparison of the HER performance of the electrodes prepared in the present study with previously reported values for metal carbide catalysts in 1 M KOH.

| Materials                                       | Electrolyte | Overpotential (mV) | Tafel slope (mV dec <sup>-1</sup> ) | Synthesis                                  | electrode type | Ref. |
|-------------------------------------------------|-------------|--------------------|-------------------------------------|--------------------------------------------|----------------|------|
| <b>MoC–Mo<sub>2</sub>C-790</b>                  | 1 M KOH     | 98.2               | 59                                  | Electrolytic<br>deposition<br>(in situ)    | Self-supported | [17] |
| <b>Mo<sub>2</sub>N–Mo<sub>2</sub>C/HG<br/>r</b> | 1 M KOH     | 154                | 68                                  | Catalytic etching<br>(ex-situ)             | Powder         | [18] |
| <b>CoMoC/Ti<br/>3C<sub>2</sub>-NC</b>           | 1 M KOH     | 75                 | 43                                  | Liquid etching,<br>annealing<br>(ex-situ)  | Powder         | [26] |
| <b>BCF/Mo<sub>2</sub><br/>C-0.4</b>             | 1 M KOH     | 71                 | 52.4                                | Hydrothermal<br>carbonization<br>(ex-situ) | Self-supported | [27] |

|                                                      |         |     |      |                                                           |                    |              |
|------------------------------------------------------|---------|-----|------|-----------------------------------------------------------|--------------------|--------------|
| <b>CNTs/Ti<sub>3</sub>C<sub>2</sub>T<sub>x</sub></b> | 1 M KOH | 93  | 128  | Liquid etching,<br>annealing<br>(ex-situ)                 | Powder             | [28]         |
| <b>Ni-GF/VC</b>                                      | 1 M KOH | 128 | 80   | Hydrothermal<br>annealing<br>(in-situ)                    | Self-<br>supported | [29]         |
| <b>Ni<sub>3</sub>C/CNT</b>                           | 1 M KOH | 132 | 49   | ALD<br>(ex-situ)                                          | Self-<br>supported | [30]         |
| <b>Fe-Ni<sub>3</sub>C</b>                            | 1 M KOH | 292 | 41.3 | Precursor method,<br>annealing<br>(ex-situ)               | Powder             | [31]         |
| <b>Ni-VC@C</b>                                       | 1 M KOH | 146 | 105  | Chemical vapour<br>carbonization<br>reaction<br>(ex-situ) | Powder             | [32]         |
| <b>WC-N/W-1200</b>                                   | 1 M KOH | 104 | 62.2 | Atmosphere sintering<br>(in-situ)                         | Self-<br>supported | This<br>work |

**Table S9.** C and N element content in WC-N/W-1200 electrode obtained by EPMA.

| <b>Point</b>         | <b>C (mol%)</b> | <b>N (mol%)</b> | <b>C/N</b> |
|----------------------|-----------------|-----------------|------------|
| <b>1</b>             | 50.8            | 4.3             | 11.8       |
| <b>2</b>             | 51.6            | 4.6             | 11.3       |
| <b>3</b>             | 51.4            | 4.6             | 11.2       |
| <b>4</b>             | 51.2            | 4.3             | 11.8       |
| <b>5</b>             | 52.7            | 4.1             | 12.9       |
| <b>6</b>             | 51.6            | 4.7             | 10.9       |
| <b>7</b>             | 52.5            | 4.4             | 12.0       |
| <b>8</b>             | 50.8            | 4.9             | 10.4       |
| <b>9</b>             | 50.4            | 4.5             | 11.1       |
| <b>10</b>            | 51.0            | 4.5             | 11.5       |
| <b>Average value</b> |                 |                 | 11.5       |

**Table S10.** Lattice constants of W, WC, WC-N/W and WC/W<sub>2</sub>N heterostructure.

| <b>Lattice constants</b> | <b>W</b> | <b>WC</b> | <b>WC-N/W</b> | <b>WC/W<sub>2</sub>N</b> |
|--------------------------|----------|-----------|---------------|--------------------------|
| <b>a (Å)</b>             | 3.20795  | 2.92871   | 5.99355       | 5.9501                   |
| <b>b (Å)</b>             | 3.20795  | 2.92871   | 5.81150       | 5.8823                   |
| <b>c (Å)</b>             | 3.20795  | 2.84987   | 13.3208       | 19.1059                  |
| <b>α (°)</b>             | 90       | 90        | 90.0084       | 90                       |
| <b>β (°)</b>             | 90       | 90        | 90.0122       | 90                       |
| <b>γ (°)</b>             | 90       | 120       | 90.0016       | 105                      |

## References

- [1] X. Fan, H. Zhou, X. Guo, *ACS Nano* **2015**, 9, 5125.
- [2] M. Zeng, Y. Chen, J. Li, H. Xue, R. G. Mendes, J. Liu, T. Zhang, M. H. Rummeli, L. Fu, *Nano Energy* **2017**, 33, 356.
- [3] N. Han, K. R. Yang, Z. Lu, Y. Li, W. Xu, T. Gao, Z. Cai, Y. Zhang, V. S. Batista, W. Liu, X. Sun, *Nat. Commun.* **2018**, 9, 924.
- [4] Z. Chen, W. Gong, S. Cong, Z. Wang, G. Song, T. Pan, X. Tang, J. Chen, W. Lu, Z. Zhao, *Nano Energy* **2020**, 68, 104335.
- [5] L.-N. Zhang, Y.-Y. Ma, Z.-L. Lang, Y.-H. Wang, S. U. Khan, G. Yan, H.-Q. Tan, H.-Y. Zang, Y.-g. Li, *J. Mater. Chem. A* **2018**, 6, 15395.
- [6] M. Yao, B. Wang, B. Sun, L. Luo, Y. Chen, J. Wang, N. Wang, S. Komarneni, X. Niu, W. Hu, *Appl. Catal. B: Environ.* **2021**, 280, 119451.
- [7] G. Yan, C. Wu, H. Tan, X. Feng, L. Yan, H. Zang, Y. Li, *J. Mater. Chem. A* **2017**, 5, 765.
- [8] Q. Gong, Y. Wang, Q. Hu, J. Zhou, R. Feng, P. N. Duchesne, P. Zhang, F. Chen, N. Han, Y. Li, C. Jin, Y. Li, S. T. Lee, *Nat. Commun.* **2016**, 7, 13216.
- [9] Z. Kou, T. Wang, H. Wu, L. Zheng, S. Mu, Z. Pan, Z. Lyu, W. Zang, S. J. Pennycook, J. Wang, *Small* **2019**, 15, e1900248.
- [10] Y. Gao, Z. Lang, F. Yu, H. Tan, G. Yan, Y. Wang, Y. Ma, Y. Li, *ChemSusChem* **2018**, 11, 1082.
- [11] J. Diao, Y. Qiu, S. Liu, W. Wang, K. Chen, H. Li, W. Yuan, Y. Qu, X. Guo, *Adv. Mater.* **2020**, 32, e1905679.
- [12] B. Ren, D. Li, Q. Jin, H. Cui, C. Wang, *J. Mater. Chem. A* **2017**, 5, 13196.
- [13] L. Huo, B. Liu, Z. Gao, J. Zhang, *J. Mater. Chem. A* **2017**, 5, 18494.
- [14] Y. Hu, B. Yu, M. Ramadoss, W. Li, D. Yang, B. Wang, Y. Chen, *ACS Sustain. Chem. Eng.* **2019**, 7, 10016.
- [15] Y. Liu, G. D. Li, L. Yuan, L. Ge, H. Ding, D. Wang, X. Zou, *Nanoscale* **2015**, 7, 3130.
- [16] Y. Ling, F. M. D. Kazim, Q. Zhang, S. Xiao, M. Li, Z. Yang, *J. Hydrogen Energy* **2021**, 46, 9699.
- [17] W. Liu, X. Wang, F. Wang, K. Du, Z. Zhang, Y. Guo, H. Yin, D. Wang, *Nat. Commun.* **2021**, 12, 6776.
- [18] H. Yan, Y. Xie, Y. Jiao, A. Wu, C. Tian, X. Zhang, L. Wang, H. Fu, *Adv. Mater.* **2018**, 30, 1704156.
- [19] X. Zhang, J. Wang, T. Guo, T. Liu, Z. Wu, L. Cavallo, Z. Cao, D. Wang, *Appl. Catal. B:*

*Environ.* **2019**, 247, 78.

- [20] Z. Yu, K. Mao, Y. Feng, *J. Adv. Ceram.* **2021**, 10, 1338.
- [21] R. Kumar, A. Gaur, T. Maruyama, C. Bera, V. Bagchi, *ACS Appl. Mater. Interfaces* **2020**, 12, 57898.
- [22] S. Li, P. Tuo, J. Xie, X. Zhang, J. Xu, J. Bao, B. Pan, Y. Xie, *Nano Energy* **2018**, 47, 512.
- [23] W. Yuan, L. Cheng, Y. An, H. Wu, N. Yao, X. Fan, X. Guo, *ACS Sustain. Chem. Eng.* **2018**, 6, 8976.
- [24] H. Zhang, Z. Ma, G. Liu, L. Shi, J. Tang, H. Pang, K. Wu, T. Takei, J. Zhang, Y. Yamauchi, J. Ye, *NPG Asia Mater.* **2016**, 8, e293.
- [25] J. J. Huang, X. Q. Liu, F. F. Meng, L. Q. He, J. X. Wang, J. C. Wu, X. H. Lu, Y. X. Tong, P. P. Fang, *J. Electroanal. Chem.* 2020, 856, 113727.
- [26] X. Wu, S. Zhou, Z. Wang, J. Liu, W. Pei, P. Yang, J. Zhao, J. Qiu, *Adv. Energy Mater.* **2019**, 9, 1901333.
- [27] J. Xiao, Y. Zhang, Z. Zhang, Q. Lv, F. Jing, K. Chi, S. Wang, *ACS Appl. Mater. Interfaces* **2017**, 9, 22604.
- [28] X. Wang, S. Wang, J. Qin, X. Xie, R. Yang, M. Cao, *Inorg. Chem.* **2019**, 58, 16524.
- [29] C. Yang, R. Zhao, H. Xiang, J. Wu, W. Zhong, W. Li, Q. Zhang, N. Yang, X. Li, *Adv. Energy Mater.* **2020**, 10, 2070152.
- [30] W. Xiong, Q. Guo, Z. Guo, H. Li, R. Zhao, Q. Chen, Z. Liu, X. Wang, *J. Mater. Chem. A* **2018**, 6, 4297.
- [31] H. Fan, H. Yu, Y. Zhang, Y. Zheng, Y. Luo, Z. Dai, B. Li, Y. Zong, Q. Yan, *Angew. Chem. Int. Ed.* **2017**, 56, 12566.
- [32] L. Peng, J. Shen, L. Zhang, Y. Wang, R. Xiang, J. Li, L. Li, Z. Wei, *J. Mater. Chem. A* **2017**, 5, 23028.
